# Supplementary figures and images for: Population pharmacokinetics and dosing optimisation of imipenem in critically ill patients
Source: PubMed Central journal article supplement — Eur J Hosp Pharm. 2023 Mar 22;31(5):434–9. doi: 10.1136/ejhpharm-2022-003403 (PMC11347199; doi:10.1136/ejhpharm-2022-003403), 2023-03-22

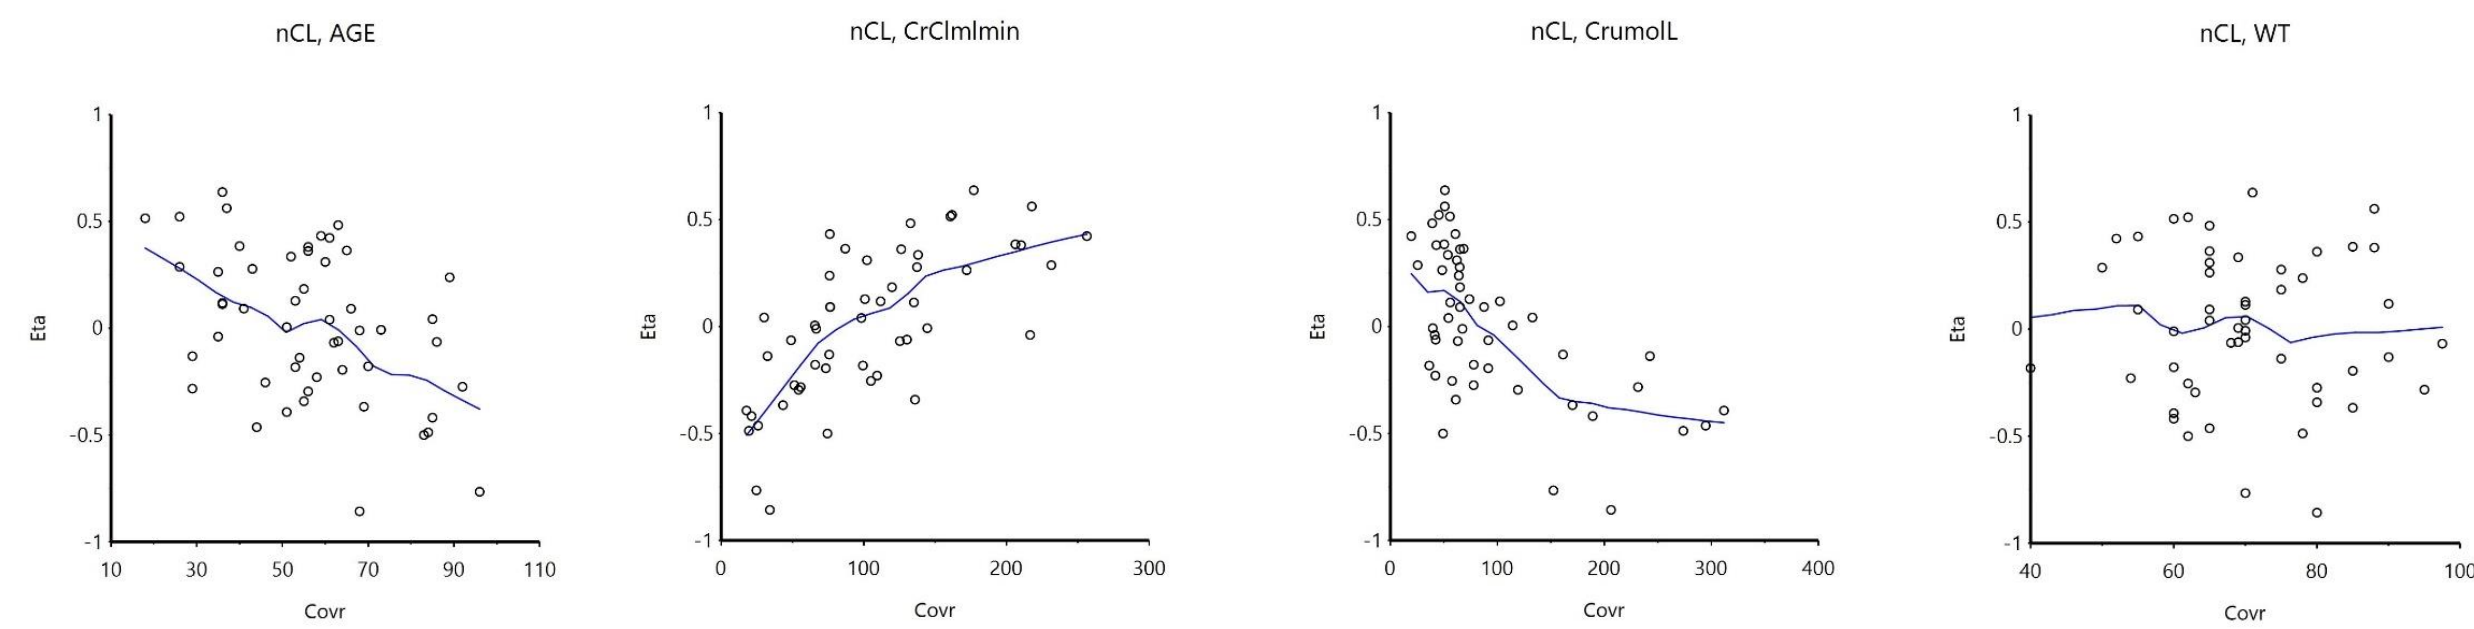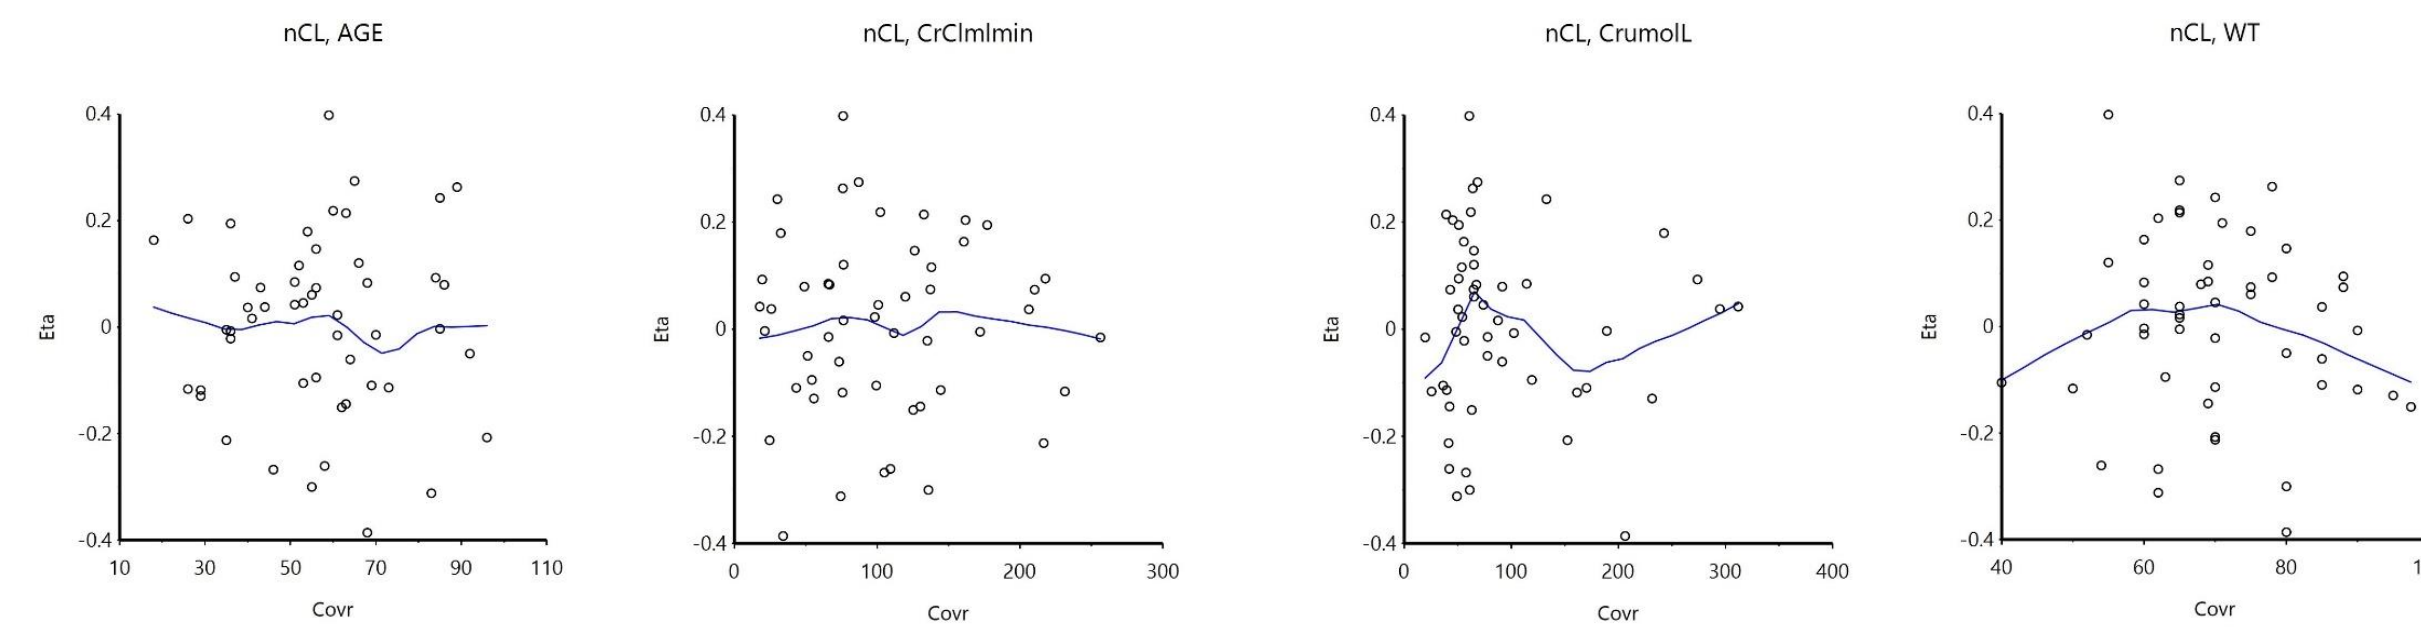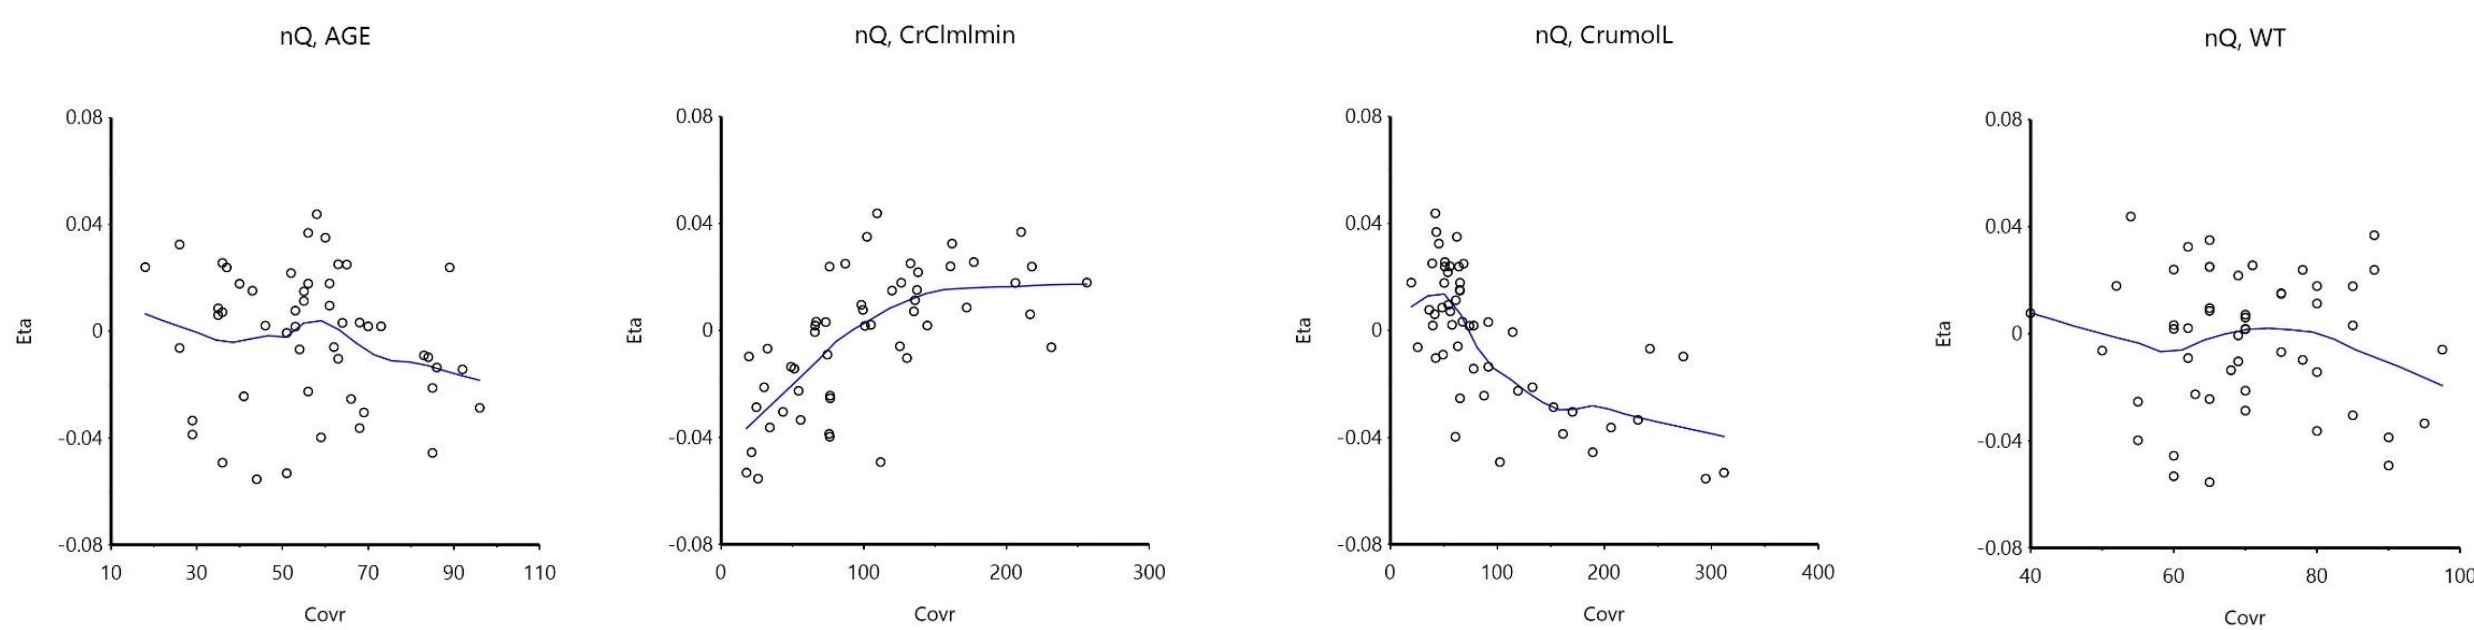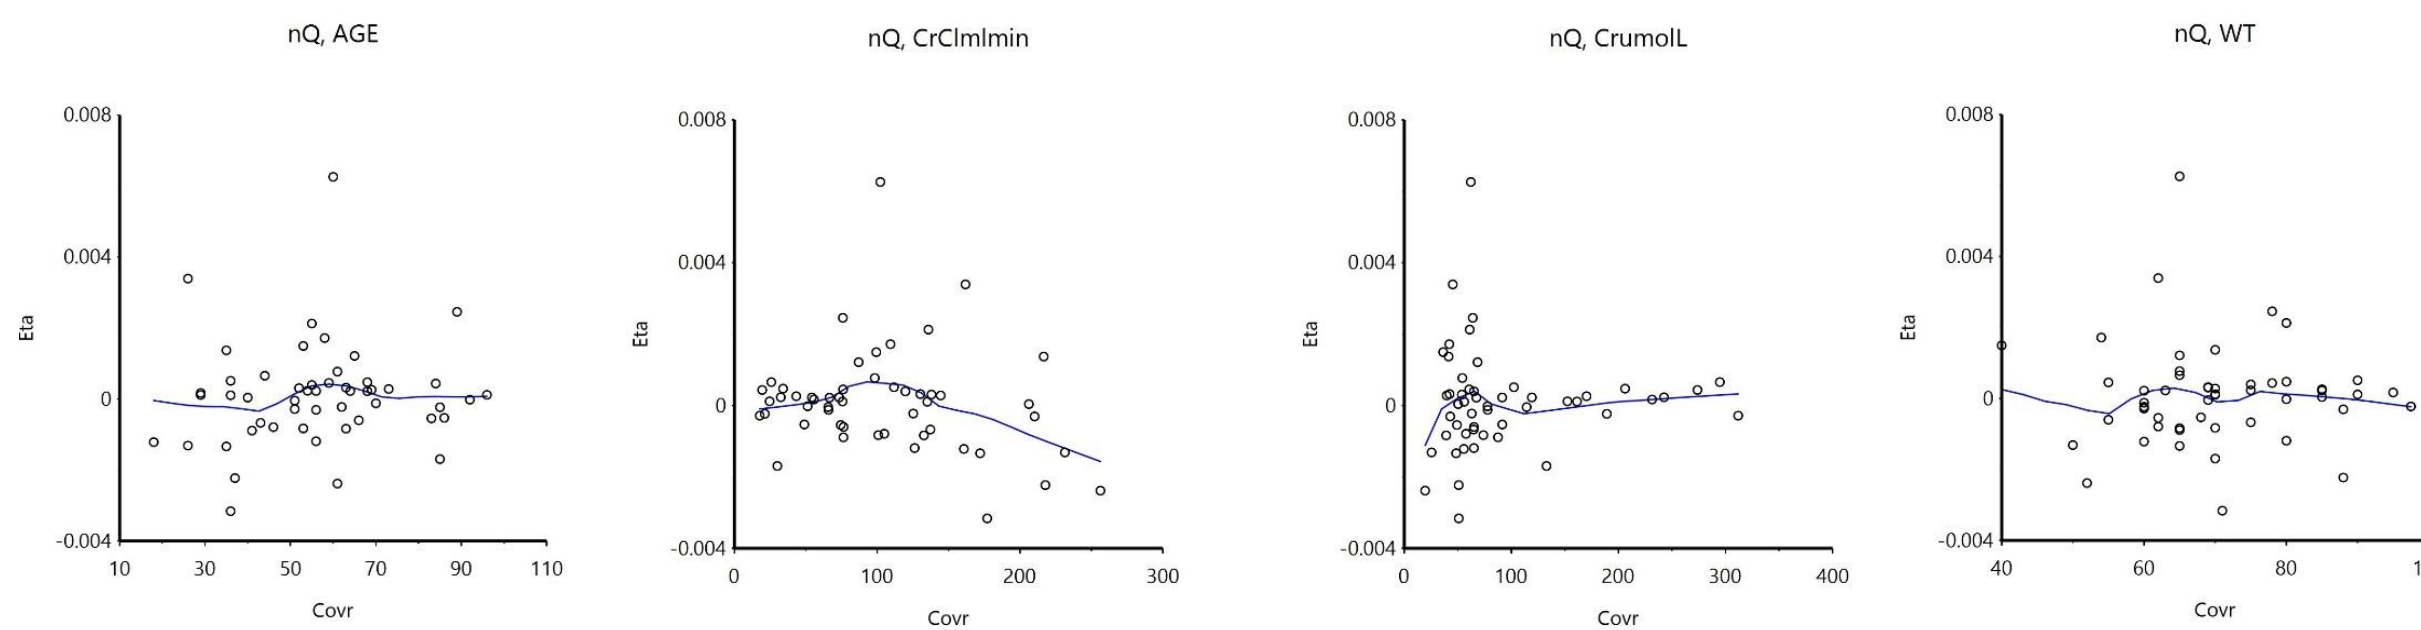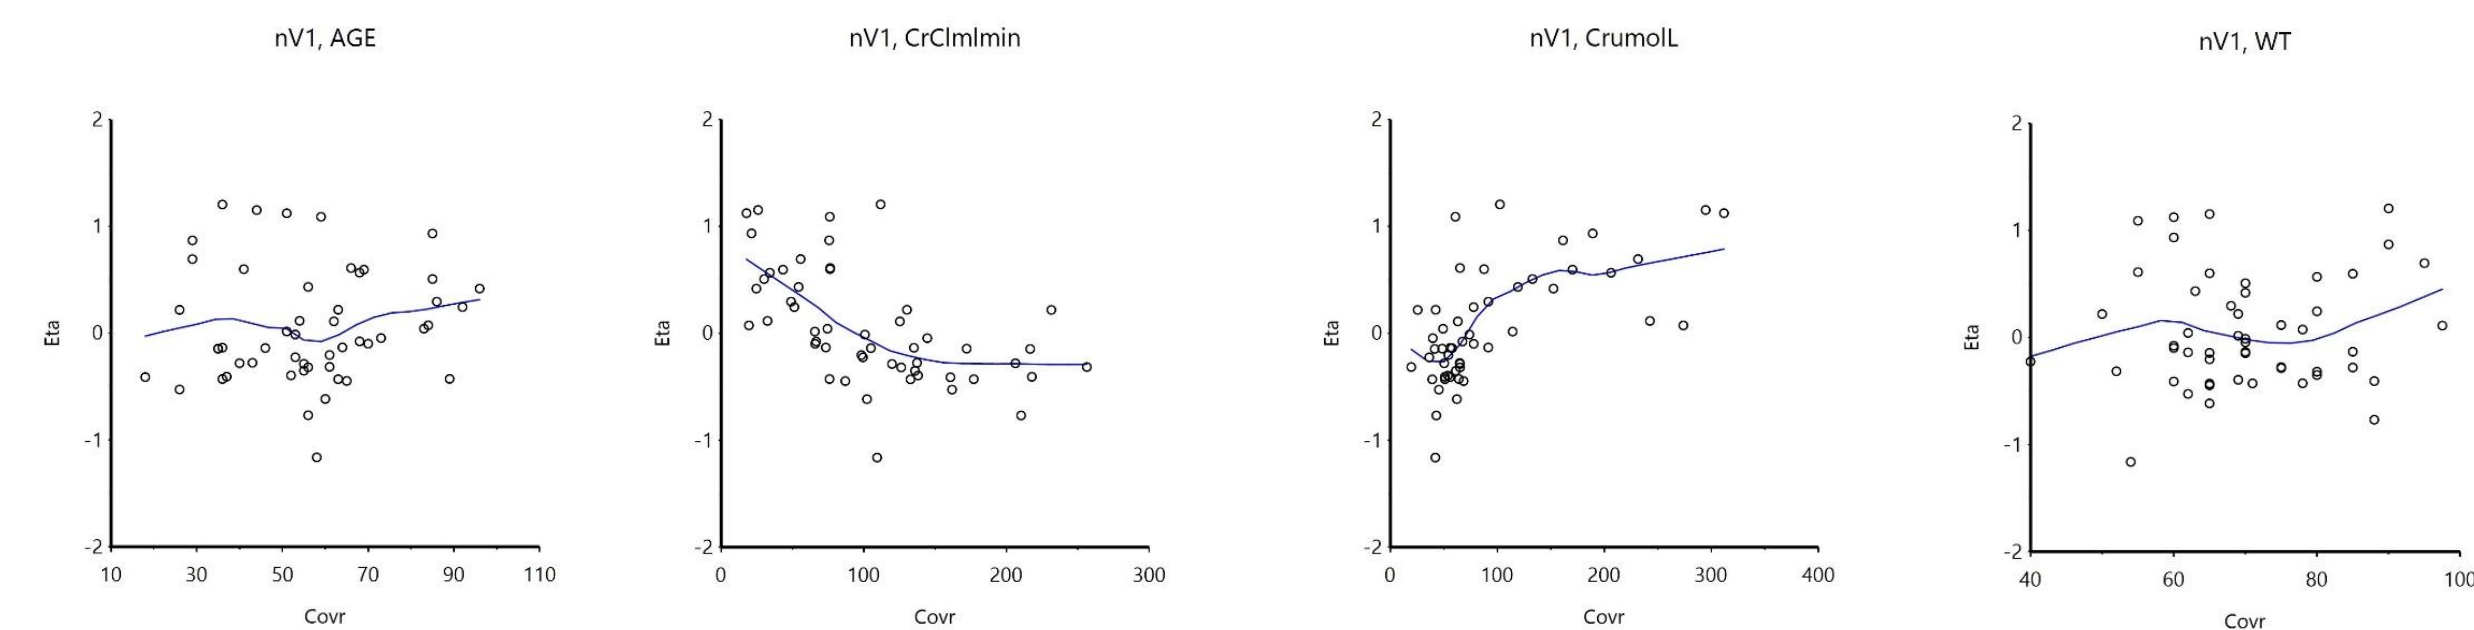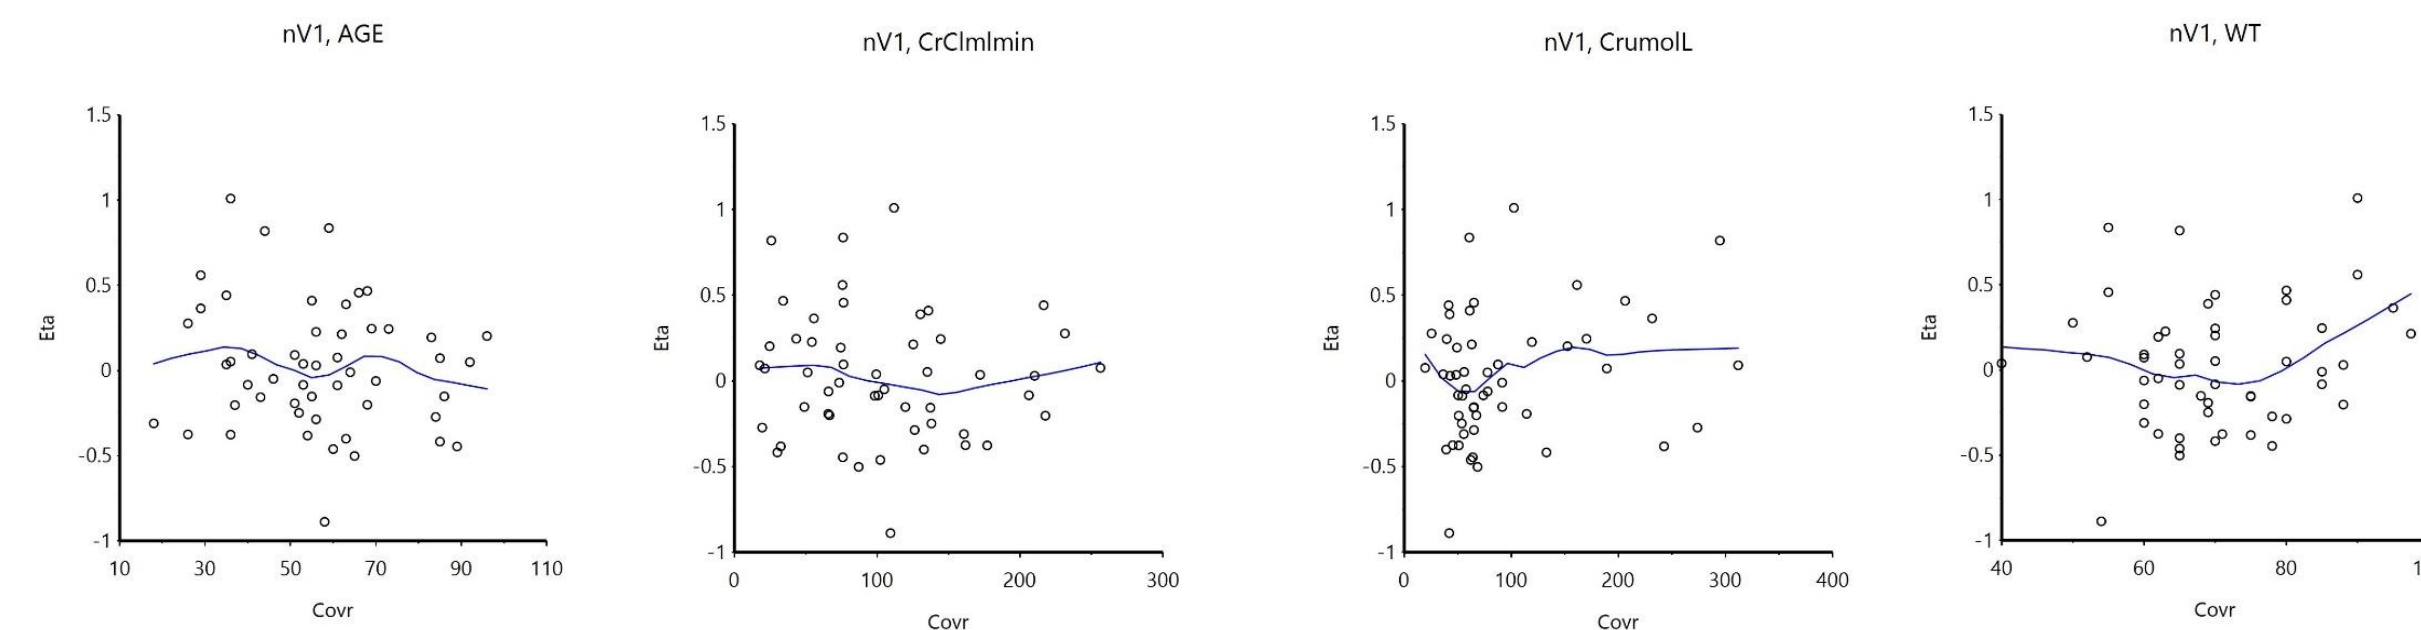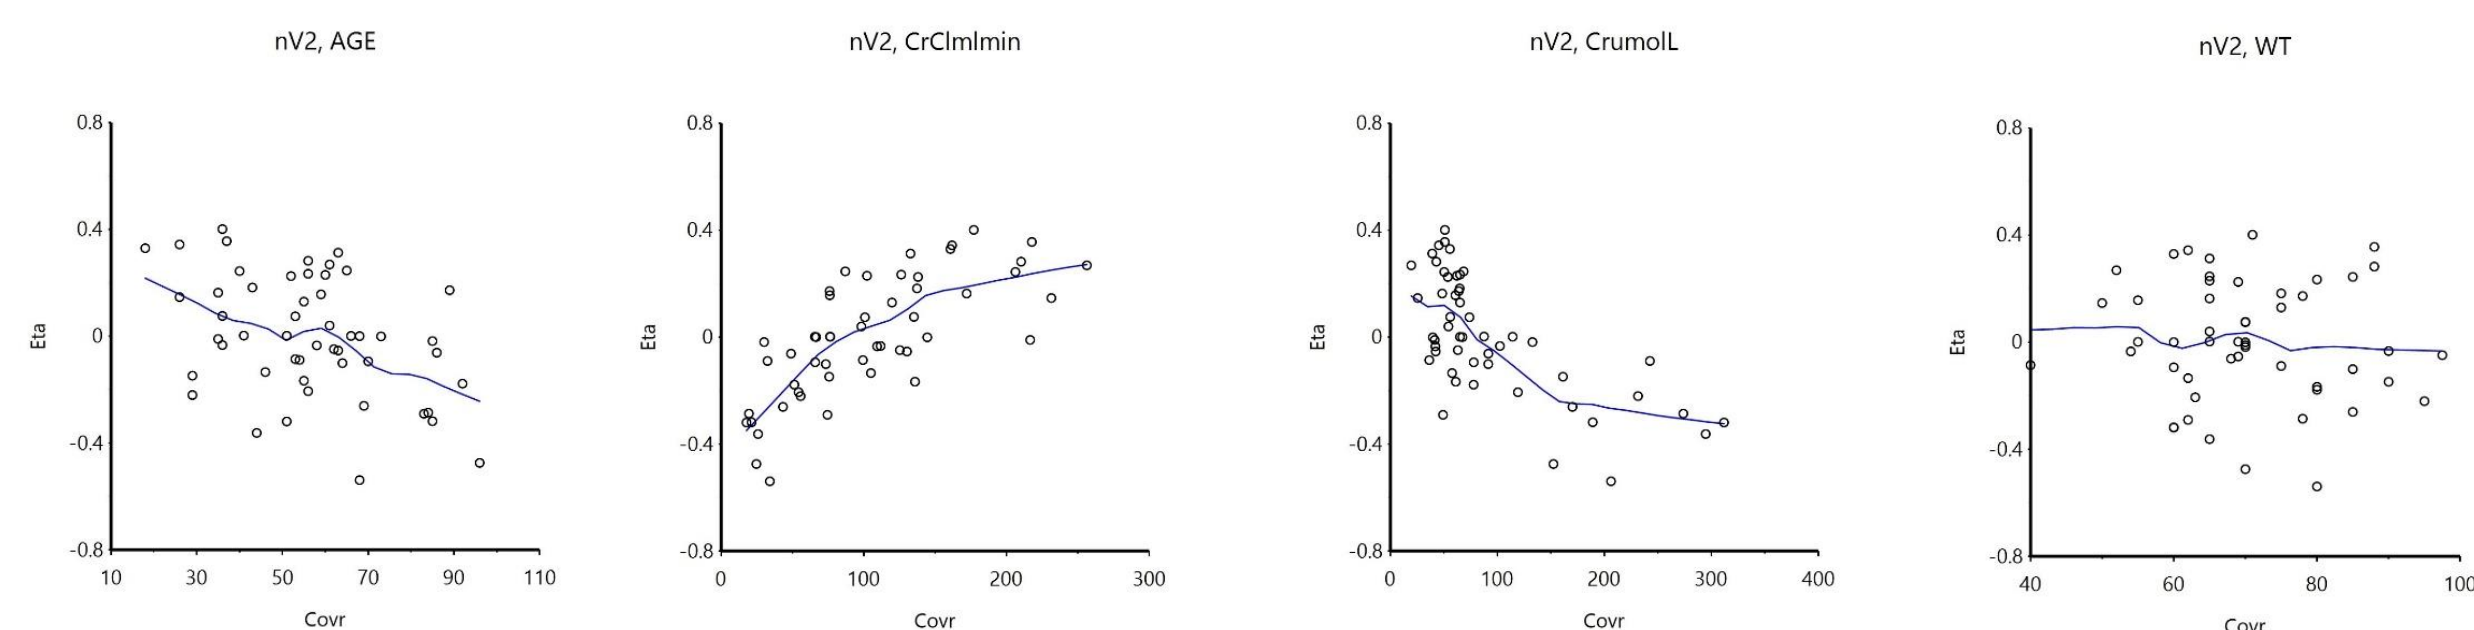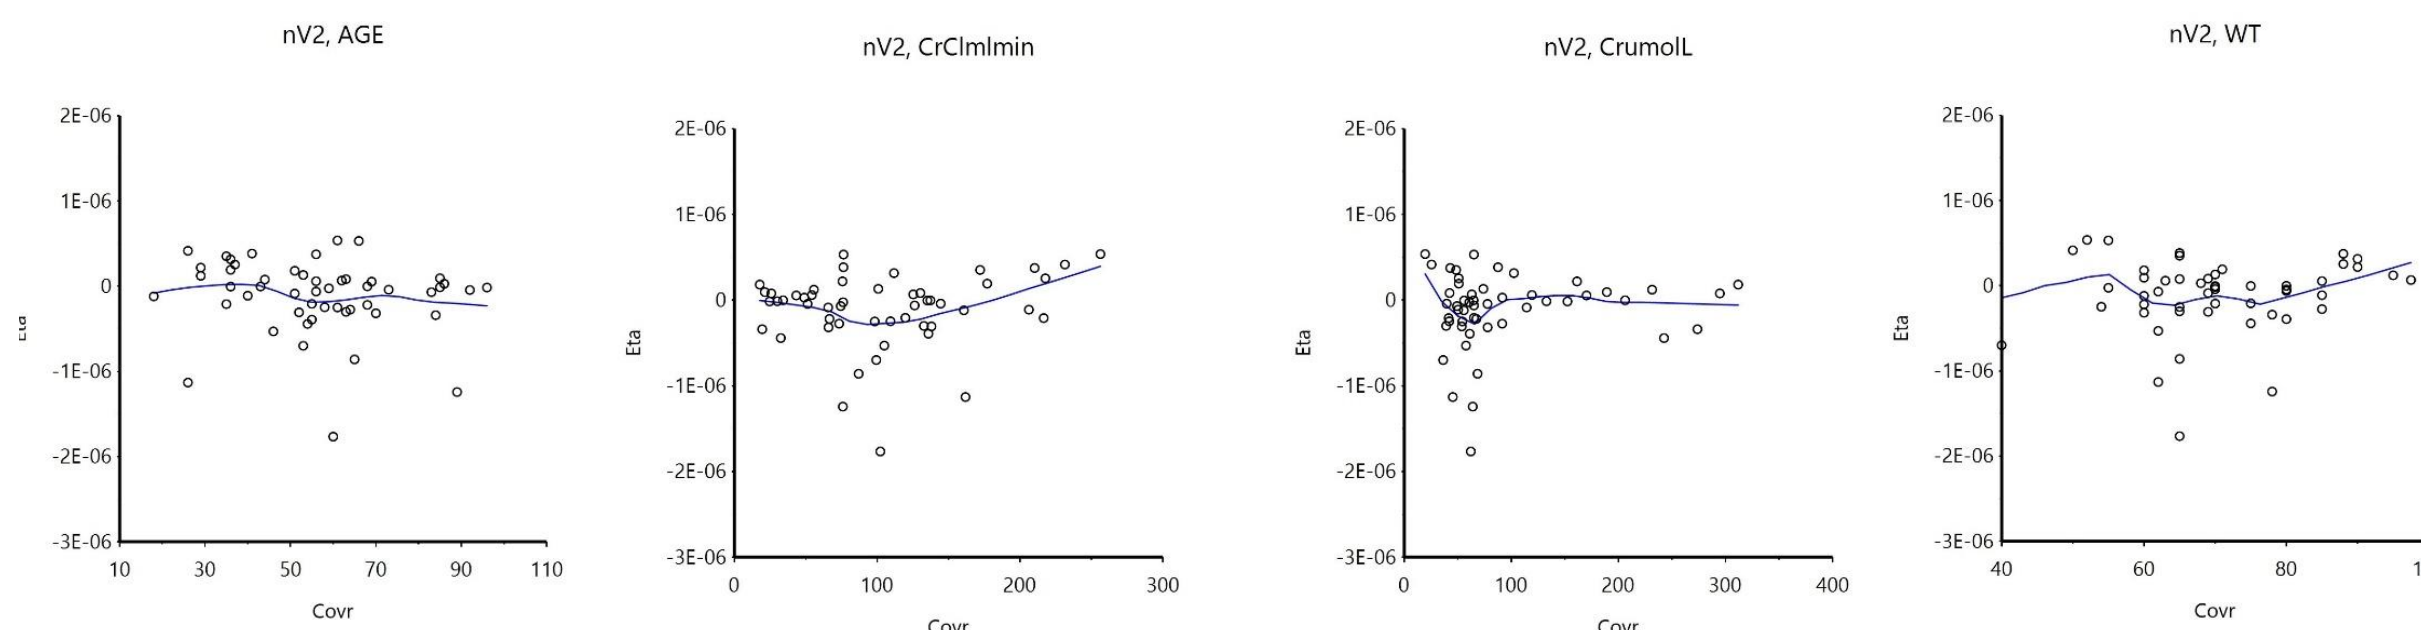

Supplement: ejhpharm-2022-003403supp001.pdf [file ejhpharm-2022-003403supp001.pdf]

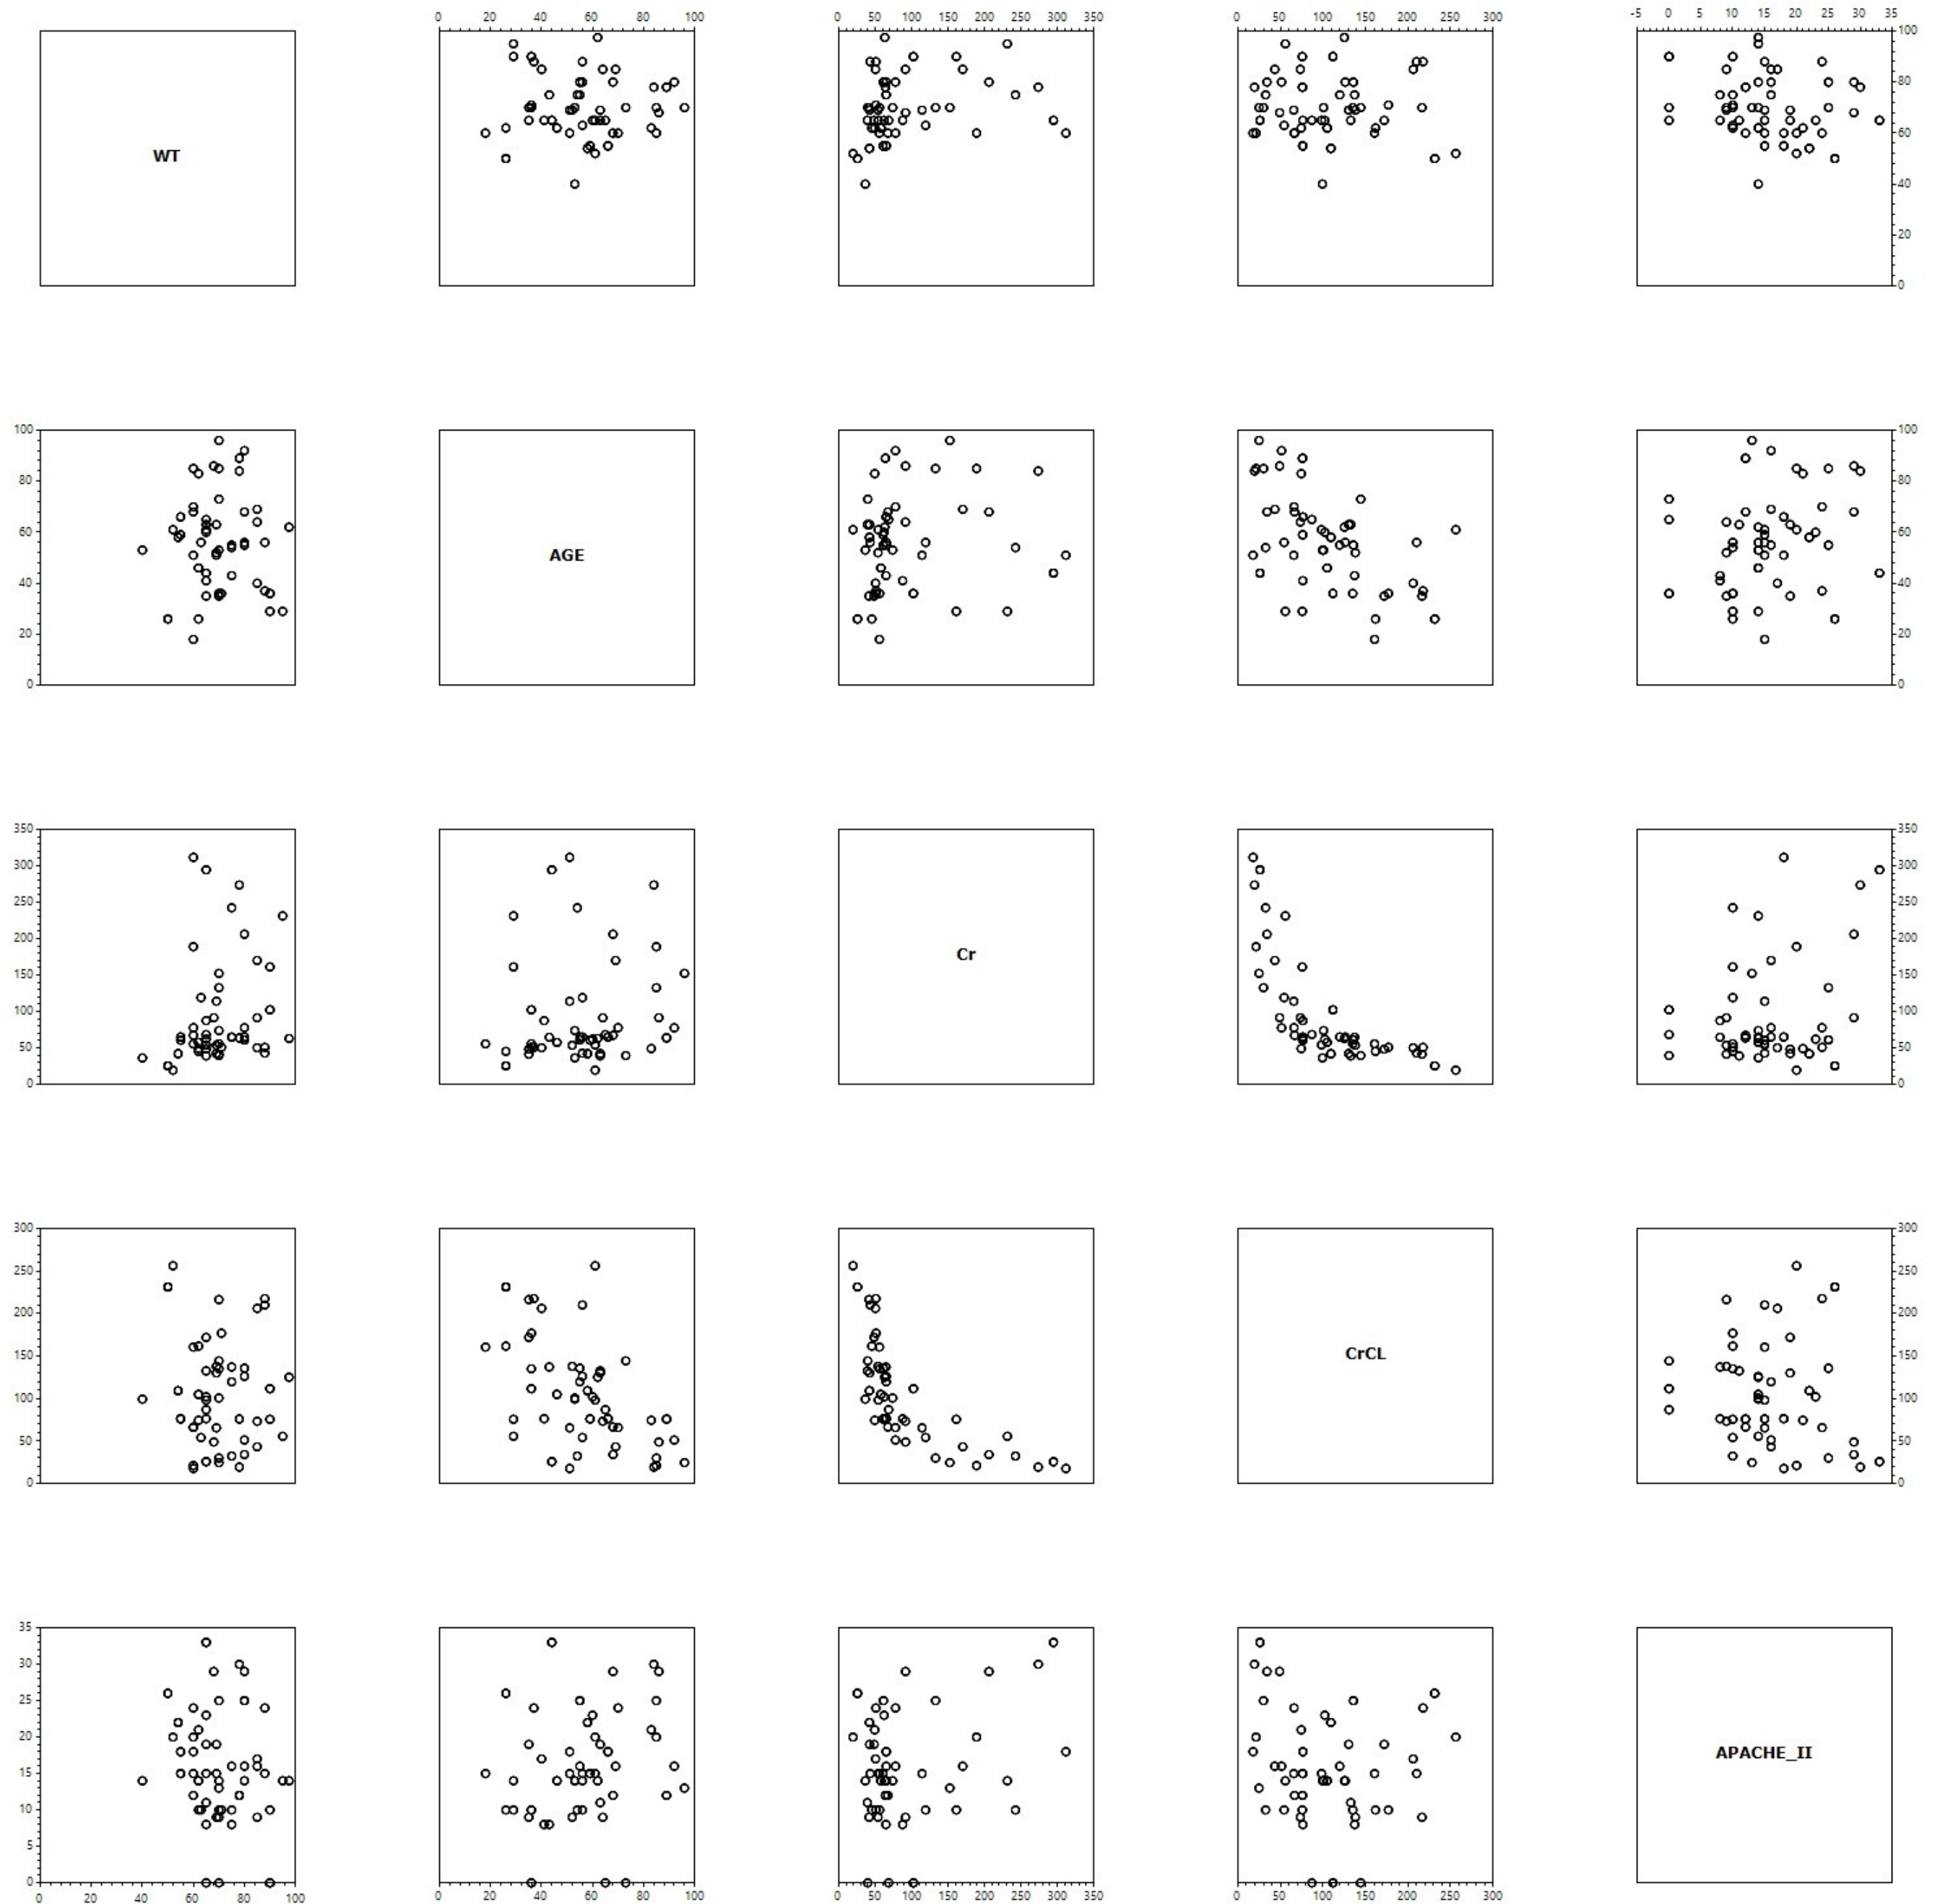

Supplement: ejhpharm-2022-003403supp002.pdf [file ejhpharm-2022-003403supp002.pdf]
